# Supplementary material
Source: ML conference proceedings conference paper supplement (https://proceedings.neurips.cc/paper_files/paper/2018/hash/33b3214d792caf311e1f00fd22b392c5-Abstract.html)
Supplement: Supplementary file [file 33b3214d792caf311e1f00fd22b392c5-Supplemental.zip]

---

# ATOMO: Communication-efficient Learning via Atomic Sparsification

---

Hongyi Wang<sup>1\*</sup>, Scott Sievert<sup>2\*</sup>, Zachary Charles<sup>2</sup>, Shengchao Liu<sup>1</sup>,  
Stephen Wright<sup>1</sup>, Dimitris Papailiopoulos<sup>2</sup>

<sup>1</sup>Department of Computer Sciences, <sup>2</sup>Department of Electrical and Computer Engineering  
University of Wisconsin-Madison

## Abstract

Distributed model training suffers from communication overheads due to frequent gradient updates transmitted between compute nodes. To mitigate these overheads, several studies propose the use of sparsified stochastic gradients. We argue that these are facets of a general sparsification method that can operate on any possible *atomic decomposition*. Notable examples include element-wise, singular value, and Fourier decompositions. We present ATOMO, a general framework for atomic sparsification of stochastic gradients. Given a gradient, an atomic decomposition, and a sparsity budget, ATOMO gives a random unbiased sparsification of the atoms minimizing variance. We show that recent methods such as QSGD and TernGrad are special cases of ATOMO and that sparsifying the singular value decomposition of neural networks gradients, rather than their coordinates, can lead to significantly faster distributed training.

## 1 Introduction

Several machine learning frameworks such as TensorFlow [1], MXNet [2], and Caffe2[3], come with distributed implementations of popular training algorithms, such as mini-batch SGD. However, the empirical speed-up gains offered by distributed training, often fall short of the optimal linear scaling one would hope for. It is now widely acknowledged that communication overheads are the main source of this speedup saturation phenomenon [4, 5, 6, 7, 8].

Communication bottlenecks are largely attributed to frequent gradient updates transmitted between compute nodes. As the number of parameters in state-of-the-art models scales to hundreds of millions [9, 10], the size of gradients scales proportionally. These bottlenecks become even more pronounced in the context of federated learning [11, 12], where edge devices (*e.g.*, mobile phones, sensors, etc) perform decentralized training, but suffer from low-bandwidth during up-link.

To reduce the cost of communication during distributed model training, a series of recent studies propose communicating low-precision or sparsified versions of the computed gradients during model updates. Partially initiated by a 1-bit implementation of SGD by Microsoft in [5], a large number of recent studies revisited the idea of low-precision training as a means to reduce communication [13, 14, 15, 16, 17, 18, 19, 17, 20, 21]. Other approaches for low-communication training focus on sparsification of gradients, either by thresholding small entries or by random sampling [6, 22, 23, 24, 25, 26, 27, 28]. Several approaches, including QSGD and TernGrad, implicitly combine quantization and sparsification to maximize performance gains [14, 16, 12, 29, 30], while providing provable guarantees for convergence and performance. We note that quantization methods in the context of gradient based updates have a rich history, dating back to at least as early as the 1970s [31, 32, 33].

---

\*These authors contributed equally

**Our Contributions** An atomic decomposition represents a vector as a linear combination of simple building blocks in an inner product space. In this work, we show that stochastic gradient sparsification and quantization are facets of a general approach that sparsifies a gradient in any possible atomic decomposition, including its entry-wise or singular value decomposition, its Fourier decomposition, and more. With this in mind, we develop ATOMO, a general framework for atomic sparsification of stochastic gradients. ATOMO sets up and optimally solves a meta-optimization that minimizes the variance of the sparsified gradient, subject to the constraints that it is sparse on the atomic basis, and also is an unbiased estimator of the input.

We show that 1-bit QSGD and TernGrad are in fact special cases of ATOMO, and each is optimal (in terms of variance and sparsity), in different parameter regimes. Then, we argue that for some neural network applications, viewing the gradient as a concatenation of matrices (each corresponding to a layer), and applying atomic sparsification to their SVD is meaningful and well-motivated by the fact that these matrices are approximately low-rank (see Fig. 1). We show that ATOMO on the SVD of each layer’s gradient, can lead to less variance, and faster training, for the same communication budget as that of QSGD or TernGrad. We present extensive experiments showing that using ATOMO with SVD sparsification can lead to up to  $2\times/3\times$  faster training time (including the time to compute the SVD) compared to QSGD/TernGrad. This holds using VGG and ResNet-18 on SVHN and CIFAR-10.

**Relation to Prior Work** ATOMO is closely related to work on communication-efficient distributed mean estimation in [29] and [30]. These works both note, as we do, that variance (or equivalently the mean squared error) controls important quantities such as convergence, and they seek to find a low-communication vector averaging scheme that minimizes it. Our work differs in two key aspects. First, we derive a closed-form solution to the variance minimization problem for all input gradients. Second, ATOMO applies to any atomic decomposition, which allows us to compare entry-wise against singular value sparsification for matrices. Using this, we derive explicit conditions for which SVD sparsification leads to lower variance for the same sparsity budget.

The idea of viewing gradient sparsification through a meta-optimization lens was also used in [34]. Our work differs in two key ways. First, [34] consider the problem of minimizing the sparsity of a gradient for a fixed variance, while we consider the reverse problem, that is, minimizing the variance subject to a sparsity budget. The second more important difference is that while [34] focuses on entry-wise sparsification, we consider a general problem where we sparsify according to any atomic decomposition. For instance, our approach directly applies to sparsifying the singular values of a matrix, which gives rise to faster training algorithms.

Finally, low-rank factorizations and sketches of the gradients when viewed as matrices were proposed in [35, 36, 37, 38, 12]; arguably most of these methods (with the exception of [12]) aimed to address the high flops required when training low-rank models. Though they did not directly aim to reduce communication, this arises as a useful side effect.

## 2 Problem Setup

In machine learning, we often wish to find a model  $w$  minimizing the *empirical risk*

$$f(w) = \frac{1}{n} \sum_{i=1}^n \ell(w; x_i) \quad (1)$$

where  $x_i \in \mathbb{R}^d$  is the  $i$ -th data point. One way to approximately minimize  $f(w)$  is by using stochastic gradient methods that operate as follows:

$$w_{k+1} = w_k - \gamma \hat{g}(w_k)$$

where  $w_0$  is some initial model,  $\gamma$  is the stepsize, and  $\hat{g}(w)$  is a stochastic gradient of  $f(w)$ , i.e. it is an unbiased estimate of the true gradient  $g(w) = \nabla f(w)$ . Mini-batch SGD, one of the most common algorithms for distributed training, computes  $\hat{g}$  as an average of  $B$  gradients, each evaluated on randomly sampled data from the training set. Mini-batch SGD is easily parallelized in the parameter

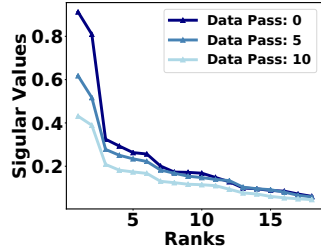

Figure 1: The singular values of a convolutional layer’s gradient, for ResNet-18 while training on CIFAR-10. The gradient of a layer can be seen as a matrix, once we vectorize and appropriately stack the conv-filters. For all presented data passes, there is a sharp decay in singular values, with the top 3 standing out.

server (PS) setup, where a PS stores the global model, and  $P$  compute nodes split the effort of computing the  $B$  gradients. Once the PS receives these gradients, it applies them to the model, and sends it back to the compute nodes.

To prove convergence bounds for stochastic-gradient based methods, we usually require  $\hat{g}(w)$  to be an unbiased estimator of the full-batch gradient, and to have small variance  $\mathbb{E}\|\hat{g}(w)\|^2$ , as this controls the speed of convergence. To see this, suppose  $w^*$  is a critical point of  $f$ , then we have

$$\mathbb{E}[\|w_{k+1} - w^*\|_2^2] = \mathbb{E}[\|w_k - w^*\|_2^2] - \underbrace{(2\gamma\langle \nabla f(w_k), w_k - w^* \rangle - \gamma^2 \mathbb{E}[\|\hat{g}(w_k)\|_2^2])}_{\text{progress at step } t}.$$

In particular, the *progress* made by the algorithm at a single step is, in expectation, controlled by the term  $\mathbb{E}[\|\hat{g}(w_k)\|_2^2]$ ; the smaller it is, the bigger the progress. This is a well-known fact in optimization, and most convergence bounds for stochastic-gradient based methods, including minibatch, involve upper bounds on  $\mathbb{E}[\|\hat{g}(w_k)\|_2^2]$ , in a multiplicative form, for both convex and nonconvex setups [39, 40, 41, 42, 43, 44, 45, 46, 47]. Hence, recent results on low-communication variants of SGD design unbiased quantized or sparse gradients, and try to minimize their variance [14, 29, 34].

Since variance is a proxy for speed of convergence, in the context of communication-efficient stochastic gradient methods, one can ask: *What is the smallest possible variance of a stochastic gradient that is represented with  $k$  bits?* This can be cast as the following meta-optimization:

$$\begin{aligned} & \min_g \mathbb{E}\|\hat{g}(w)\|^2 \\ & \text{s.t. } \mathbb{E}[\hat{g}(w)] = g(w) \\ & \quad \hat{g}(w) \text{ can be expressed with } k \text{ bits} \end{aligned}$$

Here, the expectation is taken over the randomness of  $\hat{g}$ . We are interested in designing a stochastic approximation  $\hat{g}$  that “solves” this optimization. However, it seems difficult to design a formal, tractable version of the last constraint. In the next section, we replace this with a simpler constraint that instead requires that  $\hat{g}(w)$  is sparse with respect to a given atomic decomposition.

### 3 ATOMO: Atomic Decomposition and Sparsification

Let  $(V, \langle \cdot, \cdot \rangle)$  be an inner product space over  $\mathbb{R}$  and let  $\|\cdot\|$  denote the induced norm on  $V$ . In what follows, you may think of  $g$  as a stochastic gradient of the function we wish to optimize. An *atomic decomposition* of  $g$  is any decomposition of the form  $g = \sum_{a \in \mathcal{A}} \lambda_a a$  for some set of atoms  $\mathcal{A} \subseteq V$ . Intuitively,  $\mathcal{A}$  consists of simple building blocks. We will assume that for all  $a \in \mathcal{A}$ ,  $\|a\| = 1$ , as this can be achieved by a positive rescaling of the  $\lambda_a$ .

An example of an atomic decomposition is the entry-wise decomposition  $g = \sum_i g_i e_i$  where  $\{e_i\}_{i=1}^n$  is the standard basis. More generally, any orthonormal basis of  $V$  gives rise to a unique atomic decomposition of  $g$ . While we focus on finite dimensional vectors, one could use Fourier and wavelet decompositions in this framework. When considering matrices, the singular value decomposition gives an atomic decomposition in the set of rank-1 matrices. More general atomic decompositions have found uses in a variety of situations, including solving linear inverse problems [48].

We are interested in finding an approximation to  $g$  with fewer atoms. Our primary motivation is that this reduces communication costs, as we only need to send atoms with non-zero weights. We can use whichever decomposition is most amenable for sparsification. For instance, if  $X$  is a low rank matrix, then its singular value decomposition is naturally sparse, so we can save communication costs by sparsifying its singular value decomposition instead of its entries.

Suppose  $\mathcal{A} = \{a_i\}_{i=1}^n$  and we have an atomic decomposition  $g = \sum_{i=1}^n \lambda_i a_i$ . We wish to find an unbiased estimator  $\hat{g}$  of  $g$  that is sparse in these atoms, and with small variance. Since  $\hat{g}$  is unbiased, minimizing its variance is equivalent to minimizing  $\mathbb{E}[\|\hat{g}\|^2]$ . We use the following estimator:

$$\hat{g} = \sum_{i=1}^n \frac{\lambda_i t_i}{p_i} a_i \quad (2)$$

where  $t_i \sim \text{Bernoulli}(p_i)$ , for  $0 < p_i \leq 1$ . We refer to this sparsification scheme as *atomic sparsification*. Note that the  $t_i$ ’s are independent. Recall that we assumed above that  $\|a_i\|^2 = 1$  for all  $a_i$ . We have the following lemma about  $\hat{g}$ .

**Lemma 1.**  $\mathbb{E}[\hat{g}] = g$  and  $\mathbb{E}[\|\hat{g}\|^2] = \sum_{i=1}^n \lambda_i^2 p_i^{-1} + \sum_{i \neq j} \lambda_i \lambda_j \langle a_i, a_j \rangle$ .

Let  $\lambda = [\lambda_1, \dots, \lambda_n]^T$ ,  $p = [p_1, \dots, p_n]^T$ . In order to ensure that this estimator is sparse, we fix some *sparsity budget*  $s$ . That is, we require  $\sum_i p_i = s$ . This is a *sparsity on average* constraint. We wish to minimize  $\mathbb{E}[\|\hat{g}\|^2]$  subject to this constraint. By Lemma 1, this is equivalent to

$$\min_p \sum_{i=1}^n \frac{\lambda_i^2}{p_i} \quad \text{s.t. } \forall i, 0 < p_i \leq 1, \sum_{i=1}^n p_i = s. \quad (3)$$

An equivalent form of this problem was presented in [29] (Section 6.1). The authors considered this problem for entry-wise sparsification and found a closed-form solution for  $s \leq \|\lambda\|_1 / \|\lambda\|_\infty$ . We give a version of their result but extend it to all  $s$ . A similar optimization problem was given in [34], which instead minimizes sparsity subject to a variance constraint.

---

**Algorithm 1:** ATOMO probabilities

---

**Input** :  $\lambda \in \mathbb{R}^n$  with  $|\lambda_1| \geq \dots \geq |\lambda_n|$ ; sparsity budget  $s$  such that  $0 < s \leq n$ .

**Output** :  $p \in \mathbb{R}^n$  solving (3).

```

 $i = 1$ ;
while  $i \leq n$  do
  if  $|\lambda_i|s \leq \sum_{j=i}^n |\lambda_j|$  then
    for  $k = i, \dots, n$  do
       $p_k = |\lambda_k|s \left( \sum_{j=i}^n |\lambda_j| \right)^{-1}$ ;
    end
     $i = n + 1$ ;
  else
     $p_i = 1, s = s - 1$ ;
     $i = i + 1$ ;
  end
end
end
```

---

We will show that Algorithm 1 produces  $p \in \mathbb{R}^n$  solving (3). While we show in Appendix B that this can be derived via the KKT conditions, we focus on an alternative method relaxes (3) to better understand its structure. This approach also analyzes the variance achieved by solving (3) more directly.

Note that (3) has non-empty feasible set only for  $0 < s \leq n$ . Define  $f(p) := \sum_{i=1}^n \lambda_i^2 / p_i$ . To understand how to solve (3), we first consider the following relaxation:

$$\min_p \sum_{i=1}^n \frac{\lambda_i^2}{p_i} \quad \text{s.t. } \forall i, 0 < p_i, \sum_{i=1}^n p_i = s. \quad (4)$$

We have the following lemma about the solutions to (4), first shown in [29].

**Lemma 2** ([29]). *Any feasible vector  $p$  to (4) satisfies  $f(p) \geq \frac{1}{s} \|\lambda\|_1^2$ . This is achieved iff  $p_i = \frac{|\lambda_i|s}{\|\lambda\|_1}$ .*

Lemma 2 implies that if we ignore the constraint that  $p_i \leq 1$ , then the optimal  $p$  is achieved by setting  $p_i = |\lambda_i|s / \|\lambda\|_1$ . If the quantity in the right-hand side is greater than 1, this does not give us an actual probability. This leads to the following definition.

**Definition 1.** *An atomic decomposition  $g = \sum_{i=1}^n \lambda_i a_i$  is  $s$ -unbalanced at entry  $i$  if  $|\lambda_i|s > \|\lambda\|_1$ .*

We say that  $g$  is  $s$ -balanced otherwise. Clearly, an atomic decomposition is  $s$ -balanced iff  $s \leq \|\lambda\|_1 / \|\lambda\|_\infty$ . Lemma 2 gives us the optimal way to sparsify  $s$ -balanced vectors, since the optimal  $p$  for (4) is feasible for (3). If  $g$  is  $s$ -unbalanced at entry  $j$ , we cannot assign this  $p_j$  as it is larger than 1. In the following lemma, we show that in  $p_j = 1$  is optimal in this setting.

**Lemma 3.** *Suppose that  $g$  is  $s$ -unbalanced at entry  $j$  and that  $q$  is feasible in (3). Then  $\exists p$  that is feasible such that  $f(p) \leq f(q)$  and  $p_j = 1$ .*

Let  $\phi(g) = \sum_{i \neq j} \lambda_i \lambda_j \langle a_i, a_j \rangle$ . Lemmas 2 and 3 imply the following theorem about solutions to (3).

**Theorem 4.** *If  $g$  is  $s$ -balanced, then  $\mathbb{E}[\|\hat{g}\|^2] \geq s^{-1} \|\lambda\|_1^2 + \phi(g)$  with equality if and only if  $p_i = |\lambda_i|s / \|\lambda\|_1$ . If  $g$  is  $s$ -unbalanced, then  $\mathbb{E}[\|\hat{g}\|^2] > s^{-1} \|\lambda\|_1^2 + \phi(g)$  and is minimized by  $p$  with  $p_j = 1$  where  $j = \arg \max_{i=1, \dots, n} |\lambda_i|$ .*

Due to the sorting requirement in the input, Algorithm 1 requires  $O(n \log n)$  operations. In Appendix B we describe a variant that uses only  $O(sn)$  operations. Thus, we can solve (3) in  $O(\min\{n, s\} \log(n))$  operations.

## 4 Relation to QSGD and TernGrad

In this section, we will discuss how ATOMO is related to two recent quantization schemes, 1-bit QSGD [14] and TernGrad [16]. We will show that in certain cases, these schemes are versions of the ATOMO for a specific sparsity budget  $s$ . Both schemes use the entry-wise atomic decomposition.

QSGD takes as input  $g \in \mathbb{R}^n$  and  $b \geq 1$ . This  $b$  governs the number of quantization buckets. When  $b = 1$ , QSGD produces a random vector  $Q(g)$  defined by

$$Q(g)_i = \|g\|_2 \text{sign}(g_i) \zeta_i.$$

Here, the  $\zeta_i \sim \text{Bernoulli}(|g_i|/\|g\|_2)$  are independent random variables. One can show this is equivalent to (2) with  $p_i = |g_i|/\|g\|_2$  and sparsity budget  $s = \|g\|_1/\|g\|_2$ . Note that by definition, any  $g$  is  $s$ -balanced for this  $s$ . Therefore, Theorem 4 implies that the optimal way to assign  $p_i$  with this given  $s$  is  $p_i = |g_i|/\|g\|_2$ , which agrees with 1-bit QSGD.

TernGrad takes  $g \in \mathbb{R}^n$  and produces a sparsified version  $T(g)$  given by

$$T(g)_i = \|g\|_\infty \text{sign}(g_i) \zeta_i$$

where  $\zeta_i \sim \text{Bernoulli}(|g_i|/\|g\|_\infty)$ . This is equivalent to (2) with  $p_i = |g_i|/\|g\|_\infty$  and sparsity budget  $s = \|g\|_1/\|g\|_\infty$ . Once again, any  $g$  is  $s$ -balanced for this  $s$  by definition. Therefore, Theorem 4 implies that the optimal assignment of the  $p_i$  for this  $s$  is  $p_i = |g_i|/\|g\|_\infty$ , which agrees with TernGrad.

We can generalize both of these with the following quantization method. Fix  $q \in (0, \infty]$ . Given  $g \in \mathbb{R}^n$ , we define the  $\ell_q$ -quantization of  $g$ , denoted  $L_q(g)$ , by

$$L_q(g)_i = \|g\|_q \text{sign}(g_i) \zeta_i$$

where  $\zeta_i \sim \text{Bernoulli}(|g_i|/\|g\|_q)$ . By the reasoning above, we derive the following theorem.

**Theorem 5.**  $\ell_q$ -quantization performs atomic sparsification in the standard basis with  $p_i = |g_i|/\|g\|_q$ . This solves (3) for  $s = \|g\|_1/\|g\|_q$  and satisfies  $\mathbb{E}[\|L_q(g)\|_2^2] = \|g\|_1\|g\|_q$ .

In particular, for  $q = 2$  we get 1-bit QSGD while for  $q = \infty$ , we get TernGrad.

## 5 Spectral-ATOMO: Sparsifying the Singular Value Decomposition

For a rank  $r$  matrix  $X$ , denote its singular value decomposition (SVD) by  $X = \sum_{i=1}^r \sigma_i u_i v_i^T$ . Let  $\sigma = [\sigma_1, \dots, \sigma_r]^T$ . We define the  $\ell_{p,q}$  norm of a matrix  $X$  by  $\|X\|_{p,q} = (\sum_{j=1}^m (\sum_{i=1}^n |X_{i,j}|^p)^{q/p})^{1/q}$ . When  $p = q = \infty$ , we define this to be  $\|X\|_{\max}$  where  $\|X\|_{\max} := \max_{i,j} |X_{i,j}|$ .

Let  $V$  be the space of real  $n \times m$  matrices. Given  $X \in V$ , there are two standard atomic decompositions of  $X$ . The first is the entry-wise decomposition  $X = \sum_{i,j} X_{i,j} e_i e_j^T$ .

The second is its SVD  $X = \sum_{i=1}^r \sigma_i u_i v_i^T$ . If  $r$  is small, it may be more efficient to communicate the  $r(n+m)$  entries of the SVD, rather than the  $nm$  entries of the matrix. Let  $\hat{X}$  and  $\hat{X}_\sigma$  denote the random variables in (2) corresponding to the entry-wise decomposition and singular value decomposition of  $X$ , respectively. We wish to compare these two sparsifications.

In Table 1, we compare the communication cost and variance of these two methods. The communication cost is the expected number of non-zero elements (real numbers) that need to be communicated. For  $\hat{X}$ , a sparsity budget of  $s$  corresponds to  $s$  non-zero entries we need to communicate. For  $\hat{X}_\sigma$ , a sparsity budget of  $s$  gives a communication cost of  $s(n+m)$  due to the singular vectors. We compare the optimal variance from Theorem 4.

To compare the variance of these two methods under the same communication cost, we want  $X$  to be  $s$ -balanced in its entry-wise decomposition. This holds iff  $s \leq \|X\|_{1,1}/\|X\|_{\max}$ . By Theorem 4, this gives  $\mathbb{E}[\|\hat{X}\|_F^2] = s^{-1}\|X\|_{1,1}^2$ . To achieve the same communication cost with  $\hat{X}_\sigma$ , we take a sparsity budget of  $s' = s/(n+m)$ . The SVD of  $X$  is  $s'$ -balanced iff  $s' \leq \|X\|_*/\|X\|_2$ . By Theorem 4,  $\mathbb{E}[\|\hat{X}_\sigma\|_F^2] = (n+m)s'^{-1}\|X\|_*^2$ . This leads to the following theorem.

**Theorem 6.** Suppose  $X \in \mathbb{R}^{n \times m}$  and

$$s \leq \min \left\{ \frac{\|X\|_{1,1}}{\|X\|_{\max}}, (n+m) \frac{\|X\|_*}{\|X\|_2} \right\}.$$

Table 1: Communication cost and variance of ATOMO for matrices.

| Decomposition | Comm.    | Var.                       |
|---------------|----------|----------------------------|
| Entry-wise    | $s$      | $\frac{1}{s}\ X\ _{1,1}^2$ |
| SVD           | $s(n+m)$ | $\frac{1}{s}\ X\ _*^2$     |

Then  $\hat{X}_\sigma$  with sparsity  $s' = s/(n+m)$  incurs the same communication cost as  $\hat{X}$  with sparsity  $s$ , and  $\mathbb{E}[\|\hat{X}_\sigma\|^2] \leq \mathbb{E}[\|\hat{X}\|^2]$  if and only if  $(n+m)\|X\|_*^2 \leq \|X\|_{1,1}^2$ .

To better understand this condition, we will make use of the following well-known fact.

**Lemma 7.** For any  $n \times m$  matrix  $X$  over  $\mathbb{R}$ ,  $\frac{1}{\sqrt{nm}}\|X\|_{1,1} \leq \|X\|_* \leq \|X\|_{1,1}$ .

For expository purposes, we give a proof of this Appendix C and show that these bounds are the best possible. As a result, if the first inequality is tight, then  $\mathbb{E}[\|\hat{X}_\sigma\|^2] \leq \mathbb{E}[\|\hat{X}\|^2]$ , while if the second is tight then  $\mathbb{E}[\|\hat{X}_\sigma\|^2] \geq \mathbb{E}[\|\hat{X}\|^2]$ . As we show in the next section, using singular value sparsification can translate in to significantly reduced distributed training time.

## 6 Experiments

We present an empirical study of Spectral-ATOMO and compare it to the recently proposed QSGD [14], and TernGrad [16], on a different neural network models and data sets, under real distributed environments. Our main findings are as follows:

- We observe that spectral-ATOMO provides a useful alternative to entry-wise sparsification methods, it reduces communication compared to vanilla mini-batch SGD, and can reduce training time compared to QSGD and TernGrad by up to a factor of  $2\times$  and  $3\times$  respectively. For instance, on VGG11-BN trained on CIFAR-10, spectral-ATOMO with sparsity budget 3 achieves  $3.96\times$  speedup over vanilla SGD, while 4-bit QSGD achieves  $1.68\times$  on a cluster of 16, g2.2xlarge instances. Both ATOMO and QSGD greatly outperform TernGrad as well.
- We observe that spectral-ATOMO in distributed settings leads to models with negligible accuracy loss when combined with parameter tuning.

**Implementation and setup** We compare spectral-ATOMO<sup>2</sup> with different sparsity budgets to  $b$ -bit QSGD across a distributed cluster with a parameter server (PS), implemented in mpi4py [49] and PyTorch [50] and deployed on multiple types of instances in Amazon EC2 (e.g. m5.4xlarge, m5.2xlarge, and g2.2xlarge), both PS and compute nodes are of the same type of instance. The PS implementation is standard, with a few important modifications. At the most basic level, it receives gradients from the compute nodes and broadcasts the updated model once a batch has been received.

In our experiments, we use data augmentation (random crops, and flips), and tuned the step-size for every different setup as shown in Table 5 in Appendix D. Momentum and regularization terms are switched off to make the hyperparameter search tractable and the results more legible. Tuning the step sizes for this distributed network for three different datasets and eight different coding schemes can be computationally intensive. As such, we only used small networks so that multiple networks could fit into GPU memory. To emulate the effect of larger networks, we use synchronous message communication, instead of asynchronous.

Each compute node evaluates gradients sampled from its partition of data. Gradients are then sparsified through QSGD or spectral-ATOMO, and then are sent back to the PS. Note that spectral-ATOMO transmits the weighted singular vectors sampled from the true gradient of a layer. The PS then combines these, and updates the model with the average gradient. Our entire experimental pipeline is implemented in PyTorch [50] with mpi4py [49], and deployed on either g2.2xlarge, m5.2xlarge and m5.4xlarge instances in Amazon AWS EC2. We conducted our experiments on various models, datasets, learning tasks, and neural network models as detailed in Table 2.

| Dataset       | CIFAR-10              | CIFAR-100 | SVHN      |
|---------------|-----------------------|-----------|-----------|
| # Data points | 60,000                | 60,000    | 600,000   |
| Model         | ResNet-18 / VGG-11-BN | ResNet-18 | ResNet-18 |
| # Classes     | 10                    | 100       | 10        |
| # Parameters  | 11,173k / 9,756k      | 11,173k   | 11,173k   |

Table 2: The datasets used and their associated learning models and hyper-parameters.

<sup>2</sup>code available at: <https://github.com/hwang595/ATOMO>

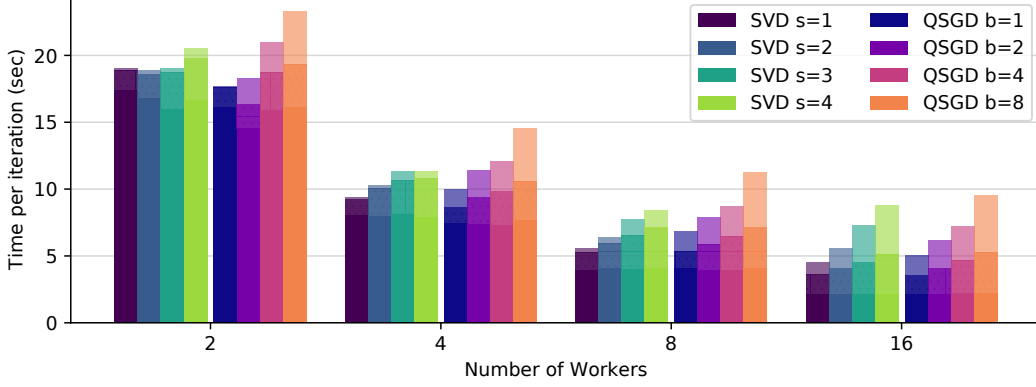

Figure 2: The timing of the gradient coding methods (QSGD and spectral-ATOMO) for different quantization levels,  $b$  bits and  $s$  sparsity budget respectively for each worker when using a ResNet-34 model on CIFAR10. For brevity, we use SVD to denote spectral-ATOMO. The bars represent the total iteration time and are divided into computation time (bottom, solid), encoding time (middle, dotted) and communication time (top, faded).

**Scalability** We study the scalability of these sparsification methods on clusters of different sizes. We used clusters with one PS and  $n = 2, 4, 8, 16$  compute nodes. We ran ResNet-34 on CIFAR-10 using mini-batch SGD with batch size 512 split among compute nodes. The experiment was run on m5.4xlarge instances of AWS EC2 and the results are shown in Figure 2.

While increasing the size of the cluster, decreases the computational cost per worker, it causes the communication overhead to grow. We denote as computational cost, the time cost required by each worker for gradient computations, while the communication overhead is represented by the amount time the PS waits to receive the gradients by the slowest worker. This increase in communication cost is non-negligible, even for moderately-sized networks with sparsified gradients. We observed a trade-off in both sparsification approaches between the information retained in the messages after sparsification and the communication overhead.

**End-to-end convergence performance** We evaluate the end-to-end convergence performance on different datasets and neural networks, training with spectral-ATOMO (with sparsity budget  $s = 1, 2, 3, 4$ ), QSGD (with  $n = 1, 2, 4, 8$  bits), and ordinary mini-batch SGD. The datasets and models are summarized in Table 2. We use ResNet-18 [9] and VGG11-BN [51] for CIFAR-10 [52] and SVHN [53]. Again, for each of these methods we tune the step size. The experiments were run on a cluster of 16 compute nodes instantiated on g2.2xlarge instances.

The gradients of convolutional layers are 4 dimensional tensors with shape of  $[x, y, k, k]$  where  $x, y$  are two spatial dimensions and  $k$  is the size of the convolutional kernel. However, matrices are required to compute the SVD for spectral-ATOMO, and we choose to reshape each layer into a matrix of size  $[xy/2, 2k^2]$ . This provides more flexibility on the sparsity budget for the SVD sparsification. For QSGD, we use the bucketing and Elias recursive coding methods proposed in [14], with bucket size equal to the number of parameters in each layer of the neural network.

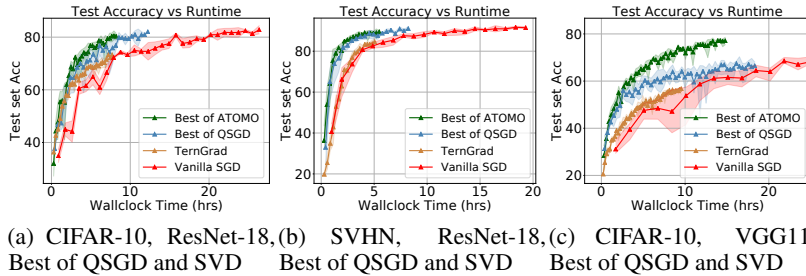

Figure 3: Convergence rates for the best performance of QSGD and spectral-ATOMO, alongside TernGrad and vanilla SGD. (a) uses ResNet-18 on CIFAR-10, (b) uses ResNet-18 on SVHN, and (c) uses VGG-11-BN on CIFAR-10. For brevity, we use SVD to denote spectral-ATOMO.

Figure 3 shows how the testing accuracy varies with wall clock time. Tables 3 and 4 give a detailed account of speedups of singular value sparsification compared to QSGD. In these tables, each method is run until a specified accuracy.

|               |     |            |            |             |             |          |
|---------------|-----|------------|------------|-------------|-------------|----------|
| Test accuracy | 60% | 3.06x      | 3.51x      | 2.19x       | 2.31x       | 1.45x    |
|               | 63% | 3.67x      | 3.6x       | 1.88x       | 2.22x       | 1.65x    |
|               | 65% | 3.01x      | 3.6x       | 1.46x       | 2.21x       | 2.19x    |
|               | 68% | 2.36x      | 2.78x      | 1.15x       | 2.01x       | 1.77x    |
|               |     | SVD<br>s=1 | SVD<br>s=2 | QSGD<br>b=1 | QSGD<br>b=2 | TernGrad |

|               |     |            |            |             |             |          |
|---------------|-----|------------|------------|-------------|-------------|----------|
| Test accuracy | 65% | 2.63x      | 1.84x      | 2.62x       | 1.79x       | 2.19x    |
|               | 71% | 2.81x      | 2.04x      | 1.81x       | 2.62x       | 1.22x    |
|               | 75% | 2.01x      | 1.79x      | 1.41x       | 1.78x       | 1.18x    |
|               | 78% | 1.81x      | 1.8x       | 1.67x       | 1.73x       | N/A      |
|               |     | SVD<br>s=3 | SVD<br>s=4 | QSGD<br>b=4 | QSGD<br>b=8 | TernGrad |

Table 3: Speedups of spectral-ATOMO with sparsity budget  $s$ ,  $b$ -bit QSGD, and TernGrad using ResNet-18 on CIFAR10 over vanilla SGD. N/A stands for the method fails to reach a certain Test accuracy in fixed iterations.

|               |     |            |            |             |             |          |
|---------------|-----|------------|------------|-------------|-------------|----------|
| Test accuracy | 75% | 3.55x      | 2.75x      | 3.22x       | 2.36x       | 1.33x    |
|               | 78% | 2.84x      | 2.75x      | 2.68x       | 1.89x       | 1.23x    |
|               | 82% | 2.95x      | 2.28x      | 2.23x       | 2.35x       | 1.18x    |
|               | 84% | 3.11x      | 2.39x      | 2.34x       | 2.35x       | 1.34x    |
|               |     | SVD<br>s=3 | SVD<br>s=4 | QSGD<br>b=4 | QSGD<br>b=8 | TernGrad |

|               |     |            |            |             |             |          |
|---------------|-----|------------|------------|-------------|-------------|----------|
| Test accuracy | 85% | 3.15x      | 2.43x      | 2.67x       | 2.35x       | 1.21x    |
|               | 86% | 2.58x      | 2.19x      | 2.29x       | 2.1x        | N/A      |
|               | 88% | 2.58x      | 2.19x      | 1.69x       | 2.09x       | N/A      |
|               | 89% | 2.72x      | 2.27x      | 2.11x       | 2.14x       | N/A      |
|               |     | SVD<br>s=3 | SVD<br>s=4 | QSGD<br>b=4 | QSGD<br>b=8 | TernGrad |

Table 4: Speedups of spectral-ATOMO with sparsity budget  $s$  and  $b$ -bit QSGD, and TernGrad using ResNet-18 on SVNH over vanilla SGD. N/A stands for the method fails to reach a certain Test accuracy in fixed iterations.

We observe that QSGD and ATOMO speed up model training significantly and achieve similar accuracy to vanilla mini-batch SGD. We also observe that the best performance is not achieved with the most sparsified, or quantized method, but the optimal method lies somewhere in the middle where enough information is preserved during the sparsification. For instance, 8-bit QSGD converges faster than 4-bit QSGD, and spectral-ATOMO with sparsity budget 3, or 4 seems to be the fastest. Higher sparsity can lead to a faster running time, but extreme sparsification can adversely affect convergence. For example, for a fixed number of iterations, 1-bit QSGD has the smallest time cost, but may converge much more slowly to an accurate model.

## 7 Conclusion

In this paper, we present and analyze ATOMO, a general sparsification method for distributed stochastic gradient based methods. ATOMO applies to any atomic decomposition, including the entry-wise and the SVD of a matrix. ATOMO generalizes 1-bit QSGD and TernGrad, and provably minimizes the variance of the sparsified gradient subject to a sparsity constraint on the atomic decomposition. We focus on the use of ATOMO for sparsifying matrices, especially the gradients in neural network training. We show that applying ATOMO to the singular values of these matrices can lead to faster training than both vanilla SGD or QSGD, for the same communication budget. We present extensive experiments showing that ATOMO can lead to up to a  $2\times$  speed-up in training time over QSGD and up to  $3\times$  speed-up in training time over TernGrad.

In the future, we plan to explore the use of ATOMO with Fourier decompositions, due to its utility and prevalence in signal processing. More generally, we wish to investigate which atomic sets lead to reduced communication costs. We also plan to examine how we can sparsify and compress gradients in a joint fashion to further reduce communication costs. Finally, when sparsifying the SVD of a matrix, we only sparsify the singular values. We also note that it would be interesting to explore jointly sparsification of the SVD and its singular vectors, which we leave for future work.



## References

- [1] Martín Abadi, Paul Barham, Jianmin Chen, Zhifeng Chen, Andy Davis, Jeffrey Dean, Matthieu Devin, Sanjay Ghemawat, Geoffrey Irving, Michael Isard, et al. TensorFlow: A system for large-scale machine learning. In *OSDI*, volume 16, pages 265–283, 2016.
- [2] Tianqi Chen, Mu Li, Yutian Li, Min Lin, Naiyan Wang, Minjie Wang, Tianjun Xiao, Bing Xu, Chiyuan Zhang, and Zheng Zhang. Mxnet: A flexible and efficient machine learning library for heterogeneous distributed systems. *arXiv preprint arXiv:1512.01274*, 2015.
- [3] Yangqing Jia, Evan Shelhamer, Jeff Donahue, Sergey Karayev, Jonathan Long, Ross Girshick, Sergio Guadarrama, and Trevor Darrell. Caffe: Convolutional architecture for fast feature embedding. *arXiv preprint arXiv:1408.5093*, 2014.
- [4] Jeffrey Dean, Greg Corrado, Rajat Monga, Kai Chen, Matthieu Devin, Mark Mao, Andrew Senior, Paul Tucker, Ke Yang, Quoc V Le, et al. Large scale distributed deep networks. In *Advances in neural information processing systems*, pages 1223–1231, 2012.
- [5] Frank Seide, Hao Fu, Jasha Droppo, Gang Li, and Dong Yu. 1-bit stochastic gradient descent and its application to data-parallel distributed training of speech dnns. In *Fifteenth Annual Conference of the International Speech Communication Association*, 2014.
- [6] Nikko Strom. Scalable distributed DNN training using commodity gpu cloud computing. In *Sixteenth Annual Conference of the International Speech Communication Association*, 2015.
- [7] Hang Qi, Evan R. Sparks, and Ameet Talwalkar. Paleo: A performance model for deep neural networks. In *Proceedings of the International Conference on Learning Representations*, 2017.
- [8] Demjan Grubic, Leo Tam, Dan Alistarh, and Ce Zhang. Synchronous multi-GPU deep learning with low-precision communication: An experimental study. 2018.
- [9] Kaiming He, Xiangyu Zhang, Shaoqing Ren, and Jian Sun. Deep residual learning for image recognition. In *Proceedings of the IEEE conference on computer vision and pattern recognition*, pages 770–778, 2016.
- [10] Gao Huang, Zhuang Liu, Kilian Q Weinberger, and Laurens van der Maaten. Densely connected convolutional networks. In *Proceedings of the IEEE conference on computer vision and pattern recognition*, volume 1, page 3, 2017.
- [11] H Brendan McMahan, Eider Moore, Daniel Ramage, Seth Hampson, et al. Communication-efficient learning of deep networks from decentralized data. *arXiv preprint arXiv:1602.05629*, 2016.
- [12] Jakub Konečný, H Brendan McMahan, Felix X Yu, Peter Richtárik, Ananda Theertha Suresh, and Dave Bacon. Federated learning: Strategies for improving communication efficiency. *arXiv preprint arXiv:1610.05492*, 2016.
- [13] Christopher M De Sa, Ce Zhang, Kunle Olukotun, and Christopher Ré. Taming the wild: A unified analysis of hogwild-style algorithms. In *Advances in neural information processing systems*, pages 2674–2682, 2015.
- [14] Dan Alistarh, Demjan Grubic, Jerry Li, Ryota Tomioka, and Milan Vojnovic. Qsgd: Communication-efficient SGD via gradient quantization and encoding. In *Advances in Neural Information Processing Systems*, pages 1707–1718, 2017.
- [15] Shuchang Zhou, Yuxin Wu, Zekun Ni, Xinyu Zhou, He Wen, and Yuheng Zou. DoReFa-Net: training low bitwidth convolutional neural networks with low bitwidth gradients. *arXiv preprint arXiv:1606.06160*, 2016.
- [16] Wei Wen, Cong Xu, Feng Yan, Chunpeng Wu, Yandan Wang, Yiran Chen, and Hai Li. Terngrad: Ternary gradients to reduce communication in distributed deep learning. In *Advances in Neural Information Processing Systems*, pages 1508–1518, 2017.

- [17] Christopher De Sa, Matthew Feldman, Christopher Ré, and Kunle Olukotun. Understanding and optimizing asynchronous low-precision stochastic gradient descent. In *Proceedings of the 44th Annual International Symposium on Computer Architecture*, pages 561–574. ACM, 2017.
- [18] Hantian Zhang, Jerry Li, Kaan Kara, Dan Alistarh, Ji Liu, and Ce Zhang. Zipml: Training linear models with end-to-end low precision, and a little bit of deep learning. In *International Conference on Machine Learning*, pages 4035–4043, 2017.
- [19] Mohammad Rastegari, Vicente Ordonez, Joseph Redmon, and Ali Farhadi. Xnor-net: Imagenet classification using binary convolutional neural networks. In *European Conference on Computer Vision*, pages 525–542. Springer, 2016.
- [20] Christopher De Sa, Megan Leszczynski, Jian Zhang, Alana Marzoev, Christopher R Aberger, Kunle Olukotun, and Christopher Ré. High-accuracy low-precision training. *arXiv preprint arXiv:1803.03383*, 2018.
- [21] Jeremy Bernstein, Yu-Xiang Wang, Kamyar Azizzadenesheli, and Anima Anandkumar. signSGD: compressed optimisation for non-convex problems. *arXiv preprint arXiv:1802.04434*, 2018.
- [22] Horia Mania, Xinghao Pan, Dimitris Papailiopoulos, Benjamin Recht, Kannan Ramchandran, and Michael I Jordan. Perturbed iterate analysis for asynchronous stochastic optimization. *arXiv preprint arXiv:1507.06970*, 2015.
- [23] Rémi Leblond, Fabian Pedregosa, and Simon Lacoste-Julien. ASAGA: asynchronous parallel SAGA. *arXiv preprint arXiv:1606.04809*, 2016.
- [24] Alham Fikri Aji and Kenneth Heafield. Sparse communication for distributed gradient descent. *arXiv preprint arXiv:1704.05021*, 2017.
- [25] Yujun Lin, Song Han, Huizi Mao, Yu Wang, and William J Dally. Deep gradient compression: Reducing the communication bandwidth for distributed training. *arXiv preprint arXiv:1712.01887*, 2017.
- [26] Chia-Yu Chen, Jungwook Choi, Daniel Brand, Ankur Agrawal, Wei Zhang, and Kailash Gopalakrishnan. Adacomp: Adaptive residual gradient compression for data-parallel distributed training. *arXiv preprint arXiv:1712.02679*, 2017.
- [27] Cédric Renggli, Dan Alistarh, and Torsten Hoefer. SparCML: high-performance sparse communication for machine learning. *arXiv preprint arXiv:1802.08021*, 2018.
- [28] Yusuke Tsuzuku, Hiroto Imachi, and Takuya Akiba. Variance-based gradient compression for efficient distributed deep learning. *arXiv preprint arXiv:1802.06058*, 2018.
- [29] Jakub Konečný and Peter Richtárik. Randomized distributed mean estimation: Accuracy vs communication. *arXiv preprint arXiv:1611.07555*, 2016.
- [30] Ananda Theertha Suresh, Felix X Yu, Sanjiv Kumar, and H Brendan McMahan. Distributed mean estimation with limited communication. *arXiv preprint arXiv:1611.00429*, 2016.
- [31] R Gitlin, J Mazo, and M Taylor. On the design of gradient algorithms for digitally implemented adaptive filters. *IEEE Transactions on Circuit Theory*, 20(2):125–136, 1973.
- [32] S Alexander. Transient weight misadjustment properties for the finite precision LMS algorithm. *IEEE Transactions on Acoustics, Speech, and Signal Processing*, 35(9):1250–1258, 1987.
- [33] José Carlos M Bermudez and Neil J Bershad. A nonlinear analytical model for the quantized LMS algorithm-the arbitrary step size case. *IEEE Transactions on Signal Processing*, 44(5):1175–1183, 1996.

- [34] Jianqiao Wangni, Jialei Wang, Ji Liu, and Tong Zhang. Gradient sparsification for communication-efficient distributed optimization. *arXiv preprint arXiv:1710.09854*, 2017.
- [35] Jian Xue, Jinyu Li, and Yifan Gong. Restructuring of deep neural network acoustic models with singular value decomposition. In *Interspeech*, pages 2365–2369, 2013.
- [36] Tara N Sainath, Brian Kingsbury, Vikas Sindhwani, Ebru Arisoy, and Bhuvana Ramabhadran. Low-rank matrix factorization for deep neural network training with high-dimensional output targets. In *Acoustics, Speech and Signal Processing (ICASSP), 2013 IEEE International Conference on*, pages 6655–6659. IEEE, 2013.
- [37] Max Jaderberg, Andrea Vedaldi, and Andrew Zisserman. Speeding up convolutional neural networks with low rank expansions. *arXiv preprint arXiv:1405.3866*, 2014.
- [38] Simon Wiesler, Alexander Richard, Ralf Schluter, and Hermann Ney. Mean-normalized stochastic gradient for large-scale deep learning. In *Acoustics, Speech and Signal Processing (ICASSP), 2014 IEEE International Conference on*, pages 180–184. IEEE, 2014.
- [39] Andrew Cotter, Ohad Shamir, Nati Srebro, and Karthik Sridharan. Better mini-batch algorithms via accelerated gradient methods. In *Advances in neural information processing systems*, pages 1647–1655, 2011.
- [40] Saeed Ghadimi and Guanghai Lan. Stochastic first-and zeroth-order methods for nonconvex stochastic programming. *SIAM Journal on Optimization*, 23(4):2341–2368, 2013.
- [41] Benjamin Recht, Christopher Re, Stephen Wright, and Feng Niu. Hogwild: A lock-free approach to parallelizing stochastic gradient descent. In *Advances in neural information processing systems*, pages 693–701, 2011.
- [42] Sébastien Bubeck et al. Convex optimization: Algorithms and complexity. *Foundations and Trends® in Machine Learning*, 8(3-4):231–357, 2015.
- [43] Christopher De Sa, Christopher Re, and Kunle Olukotun. Global convergence of stochastic gradient descent for some non-convex matrix problems. In *International Conference on Machine Learning*, pages 2332–2341, 2015.
- [44] Sashank J Reddi, Ahmed Hefny, Suvrit Sra, Barnabas Poczos, and Alex Smola. Stochastic variance reduction for nonconvex optimization. In *International conference on machine learning*, pages 314–323, 2016.
- [45] Hamed Karimi, Julie Nutini, and Mark Schmidt. Linear convergence of gradient and proximal-gradient methods under the Polyak-Łojasiewicz condition. In *Joint European Conference on Machine Learning and Knowledge Discovery in Databases*, pages 795–811. Springer, 2016.
- [46] Soham De, Abhay Yadav, David Jacobs, and Tom Goldstein. Big Batch SGD: Automated inference using adaptive batch sizes. *arXiv preprint arXiv:1610.05792*, 2016.
- [47] Dong Yin, Ashwin Pananjady, Max Lam, Dimitris Papailiopoulos, Kannan Ramchandran, and Peter Bartlett. Gradient diversity: a key ingredient for scalable distributed learning. In *International Conference on Artificial Intelligence and Statistics*, pages 1998–2007, 2018.
- [48] Venkat Chandrasekaran, Benjamin Recht, Pablo A Parrilo, and Alan S Willsky. The convex geometry of linear inverse problems. *Foundations of Computational mathematics*, 12(6):805–849, 2012.
- [49] Lisandro D Dalcin, Rodrigo R Paz, Pablo A Kler, and Alejandro Cosimo. Parallel distributed computing using python. *Advances in Water Resources*, 34(9):1124–1139, 2011.
- [50] Adam Paszke, Sam Gross, Soumith Chintala, Gregory Chanan, Edward Yang, Zachary DeVito, Zeming Lin, Alban Desmaison, Luca Antiga, and Adam Lerer. Automatic differentiation in PyTorch. 2017.

- [51] Karen Simonyan and Andrew Zisserman. Very deep convolutional networks for large-scale image recognition. *arXiv preprint arXiv:1409.1556*, 2014.
- [52] Alex Krizhevsky and Geoffrey Hinton. Learning multiple layers of features from tiny images. 2009.
- [53] Yuval Netzer, Tao Wang, Adam Coates, Alessandro Bissacco, Bo Wu, and Andrew Y Ng. Reading digits in natural images with unsupervised feature learning. In *NIPS workshop on deep learning and unsupervised feature learning*, volume 2011, page 5, 2011.

## A Proof of results

### A.1 Proof of Lemma 2

*Proof.* Suppose we have some  $p$  satisfying the conditions in (4). We define two auxiliary vectors  $\alpha, \beta \in \mathbb{R}^n$  by

$$\alpha_i = \frac{|\lambda_i|}{\sqrt{p_i}},$$

$$\beta_i = \sqrt{p_i}.$$

Then note that using the fact that  $\sum_i p_i = s$ , we have

$$f(p) = \sum_{i=1}^n \frac{\lambda_i^2}{p_i} = \left( \sum_{i=1}^n \frac{\lambda_i^2}{p_i} \right) \left( \frac{1}{s} \sum_{i=1}^n p_i \right) = \frac{1}{s} \left( \sum_{i=1}^n \frac{\lambda_i^2}{p_i} \right) \left( \sum_{i=1}^n p_i \right) = \frac{1}{s} \|\alpha\|_2^2 \|\beta\|_2^2.$$

By the Cauchy-Schwarz inequality, this implies

$$f(p) = \frac{1}{s} \|\alpha\|_2^2 \|\beta\|_2^2 \geq \frac{1}{s} |\langle \alpha, \beta \rangle|^2 = \frac{1}{s} \left( \sum_{i=1}^n |\lambda_i| \right)^2 = \frac{1}{s} \|\lambda\|_1^2. \quad (5)$$

This proves the first part of Lemma 2. In order to have  $f(p) = \frac{1}{s} \|\lambda\|_1^2$ , (5) implies that we need

$$|\langle \alpha, \beta \rangle| = \|\alpha\|_2 \|\beta\|_2.$$

By the Cauchy-Schwarz inequality, this occurs iff  $\alpha$  and  $\beta$  are linearly dependent. Therefore,  $c\alpha = \beta$  for some constant  $c$ . Solving, this implies  $p_i = c|\lambda_i|$ . Since  $\sum_{i=1}^n p_i = s$ , we have

$$c\|\lambda\|_1 = \sum_{i=1}^n c|\lambda_i| = \sum_{i=1}^n p_i = s.$$

Therefore,  $c = \|\lambda\|_1/s$ , which implies the second part of the theorem.  $\square$

### A.2 Proof of Lemma 3

Fix  $q$  that is feasible in (3). To prove Lemma 3 we will require a lemma. Given the atomic decomposition  $g = \sum_{i=1}^n \lambda_i a_i$ , we say that  $\lambda$  is  $s$ -unbalanced at  $i$  if  $|\lambda_i|s > \|\lambda\|_1$ , which is equivalent to  $g$  being unbalanced in this atomic decomposition at  $i$ . For notational simplicity, we will assume that  $\lambda$  is  $s$ -unbalanced at  $i = 1$ . Let  $A \subseteq \{2, \dots, n\}$ . We define the following notation:

$$s_A = \sum_{i \in A} q_i.$$

$$f_A(q) = \sum_{i \in A} \frac{\lambda_i^2}{q_i}.$$

$$(\lambda_A)_i = \begin{cases} \lambda_i, & \text{for } i \in A, \\ 0, & \text{for } i \notin A. \end{cases}$$

Note that under this notation, Lemma 2 implies that for all  $p > 0$ ,

$$f_A(p) \geq \frac{1}{s_A} \|\lambda_A\|_1^2. \quad (6)$$

**Lemma 8.** *Suppose that  $q$  is feasible and that there is some set  $A \subseteq \{2, \dots, n\}$  such that*

1.  $\lambda_A$  is  $(s_A + q_1 - 1)$ -balanced.
2.  $|\lambda_1|(s_A + q_1 - 1) > \|\lambda_A\|_1$ .

*Then there is a vector  $p$  that is feasible satisfying  $f(p) \leq f(q)$  and  $p_1 = 1$ .*

*Proof.* Suppose that such a set  $A$  exists. Let  $B = \{2, \dots, n\} \setminus A$ . Note that we have

$$f(q) = \sum_{i=1}^n \frac{\lambda_i^2}{q_i} = \frac{\lambda_1^2}{q_1} + f_A(q) + f_B(q).$$

By (6), this implies

$$f(q) \geq \frac{\lambda_1^2}{q_1} + \frac{1}{s_A} \|\lambda_A\|_1^2 + f_B(q). \quad (7)$$

Define  $p$  as follows.

$$p_i = \begin{cases} 1, & \text{for } i = 1, \\ \frac{|\lambda_i|(s_A + q_1 - 1)}{\|\lambda_A\|_1}, & \text{for } i \in A, \\ q_i, & \text{for } i \notin A. \end{cases}$$

Note that by Assumption 1 and Lemma 2, we have

$$f_A(p) = \frac{1}{s_A + q_1 - 1} \|\lambda_A\|_1^2.$$

Since  $p_i = q_i$  for  $i \in B$ , we have  $f_B(p) = f_B(q)$ . Therefore,

$$f(p) = \lambda_1^2 + \frac{1}{s_A + q_1 - 1} \|\lambda_A\|_1^2 + f_B(q). \quad (8)$$

Combining (7) and (8), we have

$$\begin{aligned} f(q) - f(p) &= \lambda_1^2 \left( \frac{1}{q_1} - 1 \right) + \|\lambda_A\|_1^2 \left( \frac{1}{s_A} - \frac{1}{s_A + q_1 - 1} \right) \\ &= \lambda_1^2 \left( \frac{1 - q_1}{q_1} \right) + \|\lambda_A\|_1^2 \left( \frac{q_1 - 1}{s_A(s_A + q_1 - 1)} \right). \end{aligned}$$

Combining this with Assumption 2, we have

$$f(q) - f(p) \geq \frac{\|\lambda_A\|_1^2}{(s_A + q_1 - 1)^2} \left( \frac{1 - q_1}{q_1} \right) + \|\lambda_A\|_1^2 \left( \frac{q_1 - 1}{s_A(s_A + q_1 - 1)} \right). \quad (9)$$

To show that the RHS of (9) is at most 0, it suffices to show

$$s_A \geq q_1(s_A + q_1 - 1). \quad (10)$$

However, note that since  $0 < q_1 < 1$ , the RHS of (10) satisfies

$$q_1(s_A + q_1 - 1) = s_A q_1 - q_1(1 - q_1) \leq s_A q_1 \leq s_A.$$

Therefore, (10) holds, completing the proof.  $\square$

We can now prove Lemma 3. In the following, we will refer to Conditions 1 and 2, relative to some set  $A$ , as the conditions required by Lemma 8.

*Proof.* We first show this in the case that  $n = 2$ . Here we have the atomic decomposition

$$g = \lambda_1 a_1 + \lambda_2 a_2.$$

The condition that  $\lambda$  is  $s$ -unbalanced at  $i = 1$  implies

$$|\lambda_1|(s - 1) > |\lambda_2|.$$

In particular, this implies  $s > 1$ . For  $A = \{2\}$ , Condition 1 is equivalent to

$$|\lambda_2|(s_A + q_1 - 2) \leq 0.$$

Note that  $s_A = q_2$  and that  $q_1 + q_2 - 2 = s - 2$  by assumption. Since  $q_i \leq 1$ , we know that  $s - 2 \leq 0$  and so Condition 1 holds. Similarly, Condition 2 becomes

$$|\lambda_1|(s - 1) > |\lambda_2|$$

which holds by assumption. Therefore, Lemma 3 holds for  $n = 2$ .

Now suppose that  $n > 2$ ,  $q$  is some feasible probability vector, and that  $\lambda$  is  $s$ -unbalanced at index 1. We wish to find an  $A$  satisfying Conditions 1 and 2. Consider  $B = \{2, \dots, n\}$ . Note that for such  $B$ ,  $s_B + q_1 - 1 = s - 1$ . By our unbalanced assumption, we know that Condition 2 holds for  $B = \{2, \dots, n\}$ . If  $\lambda_B$  is  $(s - 1)$ -balanced, then Lemma 8 implies that we are done.

Assume that  $\lambda_B$  is not  $(s - 1)$ -balanced. After relabeling, we can assume it is unbalanced at  $i = 2$ . Let  $C = \{3, \dots, n\}$ . Therefore,

$$|\lambda_2|(s - 2) > \|\lambda_C\|_1. \quad (11)$$

Combining this with the  $s$ -unbalanced assumption at  $i = 1$ , we find

$$\begin{aligned} |\lambda_1| &> \frac{\|\lambda_B\|_1}{s - 1} \\ &= \frac{|\lambda_2|}{s - 1} + \frac{\|\lambda_C\|_1}{s - 1} \\ &> \frac{\|\lambda_C\|_1}{(s - 1)(s - 2)} + \frac{\|\lambda_C\|_1}{s - 1} \\ &= \frac{\|\lambda_C\|_1}{s - 2}. \end{aligned}$$

Therefore,

$$|\lambda_1|(s - q_2 - 1) \geq |\lambda_1|(s - 2) > \|\lambda_C\|_1. \quad (12)$$

Let  $D = \{1, 3, 4, \dots, n\} = \{1, \dots, n\} \setminus \{2\}$ . Then note that (12) implies that  $\lambda_D$  is  $(s - q_2)$ -unbalanced at  $i = 1$ . Inductively applying this theorem, this means that we can find a vector  $p' \in \mathbb{R}^{|D|}$  such that  $p'_1 = 1$  and  $f_D(p') \leq f_D(q)$ . Moreover,  $s_D(p') = s - q_2$ . Therefore, if we let  $p$  be the vector that equals  $p'$  on  $D$  and with  $p_2 = q_2$ , we have

$$f(p_2) = f_C(p') + \frac{\lambda_2^2}{q_2} \leq f_D(q) + \frac{\lambda_2^2}{q_2} = f(q).$$

This proves the desired result.  $\square$

## B Analysis of ATOMO via the KKT Conditions

In this section we show how to derive Algorithm 1 using the KKT conditions. Recall that we wish to solve the following optimization problem:

$$\min_p f(p) := \sum_{i=1}^n \frac{\lambda_i^2}{p_i} \quad \text{subject to } \forall i, 0 < p_i \leq 1, \quad \sum_{i=1}^n p_i = s. \quad (13)$$

We first note a few immediate consequences.

1. If  $s > n$  then the problem is infeasible. Note that when  $s \geq n$ , the optimal thing to do is to set all  $p_i = 1$ , in which case no sparsification takes place.
2. If  $\lambda_i = 0$ , then  $p_i = 0$ . This follows from the fact that this  $p_i$  does not change the value of  $f(p)$ , and the objective could be decreased by allocating more to the  $p_j$  associated to non-zero  $\lambda_j$ . Therefore we can assume that all  $\lambda_i \neq 0$ .
3. If  $|\lambda_i| \geq |\lambda_j| > 0$ , then we can assume  $p_i \geq p_j$ . Otherwise, suppose  $p_j > p_i$  but  $|\lambda_i| \geq |\lambda_j|$ . Let  $p'$  denote the vector with  $p_i, p_j$  switched. We then have

$$\begin{aligned} f(p) - f(p') &= \frac{\lambda_i^2 - \lambda_j^2}{p_i} + \frac{\lambda_j^2 - \lambda_i^2}{p_j} \\ &= \lambda_i^2 \left( \frac{1}{p_i} - \frac{1}{p_j} \right) - \lambda_j^2 \left( \frac{1}{p_i} - \frac{1}{p_j} \right) \\ &\geq 0. \end{aligned}$$

We therefore assume  $0 < s \leq n$  and  $|\lambda_1| \geq |\lambda_2| \geq \dots \geq |\lambda_n| > 0$ . As above we define  $\lambda := [\lambda_1, \dots, \lambda_n]^T$ . While the formulation of (13) does not allow direct application of the KKT conditions, since we have a strict inequality of  $0 < p_i$ , this is fixed with the following lemma.

**Lemma 9.** *The minimum of (13) is achieved by some  $p^*$  satisfying*

$$p_i^* \geq \frac{s\lambda_i^2}{n\|\lambda\|_2^2}.$$

*Proof.* Define  $\bar{p}$  by  $\bar{p}_i = s/n$ . This vector is clearly feasible in (13). Let  $p$  be any feasible vector. If  $f(p) \leq f(\bar{p})$  then for any  $i \in [n]$  we have

$$\frac{\lambda_i^2}{p_i} \leq f(p) \leq f(\bar{p}).$$

Therefore,  $p_i \geq \lambda_i^2/f(\bar{p})$ . A straightforward computations shows that  $f(\bar{p}) = n\|\lambda\|_2^2/s$ . Note that this implies that we can restrict to the feasible set

$$\frac{s\lambda_i^2}{n\|\lambda\|_2^2} \leq p_i \leq 1.$$

This defines a compact region  $C$ . Since  $f$  is continuous on this set, its maximum value is obtained at some  $p^*$ .  $\square$

The KKT conditions then imply that at any point  $p$  solving (13), we must have

$$0 \leq 1 - p_i \perp \mu - \frac{\lambda_i^2}{p_i} \geq 0, \quad i = 1, 2, \dots, n \quad (14)$$

for some  $\mu \in \mathbb{R}$ . Since  $|\lambda_i| > 0$  for all  $i$ , we actually must have  $\mu > 0$ . We therefore have two conditions for all  $i$ .

1.  $p_i = 1 \implies \mu \geq \lambda_i^2$ .
2.  $p_i < 1 \implies p_i = |\lambda_i|/\sqrt{\mu}$ .

Note that in either case, to have  $p_1$  feasible we must have  $\mu \geq \lambda_1^2$ . Combining this with the fact that we can always select  $p_1 \geq p_2 \geq \dots \geq p_n$ , we obtain the following partial characterization of the solution to (13). For some  $n_s \in [n]$ , we have  $p_1, \dots, p_{n_s} = 1$  while  $p_i = |\lambda_i|/\sqrt{\mu} \in (0, 1)$  for  $i = n_s + 1, \dots, n$ . Combining this with the constraint that  $\sum_{i=1}^n p_i = s$ , we have

$$s = \sum_{i=1}^n p_i = n_s + \sum_{i=n_s+1}^n p_i = n_s + \sum_{i=n_s+1}^n \frac{|\lambda_i|}{\sqrt{\mu}}. \quad (15)$$

Rearranging, we obtain

$$\mu = \frac{(\sum_{i=n_s+1}^n |\lambda_i|)^2}{(s - n_s)^2} \quad (16)$$

which then implies that

$$p_i = 1, \quad i = 1, \dots, n_s, \quad p_i = \frac{|\lambda_i|(s - n_s)}{\sum_{j=n_s+1}^n |\lambda_j|}, \quad i = n_s + 1, \dots, n. \quad (17)$$

Thus, we need to select  $n_s$  such that the  $p_i$  in (17) are bounded above by 1. Let  $n_s^*$  denote the first element of  $[n]$  for which this holds. Then the condition that  $p_i \leq 1$  for  $i = n_s^* + 1, \dots, n$  is exactly the condition that  $[\lambda_{n_s^*+1}, \dots, \lambda_n]$  is  $(s - n_s)$ -balanced. In particular, Lemma 2 implies that, fixing  $p_i = 1$  for  $i = 1, \dots, n_s^*$ , the optimal way to assign the remaining  $p_i$  is by

$$p_i = \frac{|\lambda_i|(s - n_s^*)}{\sum_{j=n_s^*+1}^n |\lambda_j|}.$$

This agrees with (17) for  $n_s = n_s^*$ . In particular, the minimal value of  $f$  occurs at the first value of  $n_s$  such that the  $p_i$  in (17) are bounded above by 1.

Algorithm 1 scans through the sorted  $\lambda_i$  and finds the first value of  $n_s$  for which the probabilities in (17) are in  $[0, 1]$ , and therefore finds the optimal  $p$  for (13). The runtime is dominated by the  $O(n \log n)$  sorting cost. It is worth noting that we could perform the algorithm in  $O(sn)$  time as well. Instead of sorting and then iterating through the  $\lambda_i$  in order, at each step we could simply select the next largest  $|\lambda_i|$  not yet seen and perform an analogous test and update as in the above algorithm. Since we would have to do the selection step at most  $s$  times, this leads to an  $O(sn)$  complexity algorithm.



## C Equivalence of norms

We are often interested in comparing norms on vectors spaces. This naturally leads to the following definition.

**Definition 2.** Let  $V$  be a vector space over  $\mathbb{R}$  or  $\mathbb{C}$ . Two norms  $\|\cdot\|_a, \|\cdot\|_b$  are equivalent if there are positive constants  $C_1, C_2$  such that

$$C_1\|x\|_a \leq \|x\|_b \leq C_2\|x\|_a$$

for all  $x \in V$ .

As it turns out, norms on finite-dimensional vector spaces are always equivalent.

**Theorem 10.** Let  $V$  be a finite-dimensional vector space over  $\mathbb{R}$  or  $\mathbb{C}$ . Then all norms are equivalent.

In order to compare norms, we often wish to determine the tightest constants which give equivalence between them. In Section 5, we are particularly interested in comparing the  $\|X\|_*$  and  $\|X\|_{1,1}$  on the space of  $n \times m$  matrices. We have the following lemma.

**Lemma 11.** For all  $n \times m$  real matrices,

$$\frac{1}{\sqrt{nm}}\|X\|_{1,1} \leq \|X\|_* \leq \|X\|_{1,1}.$$

*Proof.* Suppose that  $X$  has the singular value decomposition

$$X = \sum_{i=1}^r \sigma_i u_i v_i^T.$$

We will first show the left inequality. First, note that for any  $n \times m$  matrix  $A$ ,  $\|A\|_{1,1} \leq \sqrt{nm}\|A\|_F$ . This follows directly from the fact that for a  $n$ -dimensional vector  $v$ ,  $\|v\|_1 \leq \sqrt{n}\|v\|_2$ . We will also use the fact that for any vectors  $u \in \mathbb{R}^n, v \in \mathbb{R}^m$ ,  $\|uv^T\|_F = \|u\|_2\|v\|_2$ . We then have

$$\begin{aligned} \|X\|_{1,1} &= \left\| \sum_{i=1}^r \sigma_i u_i v_i^T \right\|_{1,1} \\ &\leq \sum_{i=1}^r \sigma_i \|u_i v_i^T\|_{1,1} \\ &= \sum_{i=1}^r \sigma_i \sqrt{nm} \|u_i v_i^T\|_F \\ &= \sum_{i=1}^r \sigma_i \sqrt{nm} \|u_i\|_2 \|v_i\|_2 \\ &= \|X\|_*. \end{aligned}$$

For the right inequality, note that we have

$$X = \sum_{i,j} X_{i,j} e_i e_j^T$$

where  $e_i \in \mathbb{R}^n$  is the  $i$ -th standard basis vector, while  $e_j \in \mathbb{R}^m$  is the  $j$ -th standard basis vector. We then have

$$\|X\|_* \leq \sum_{i,j} |X_{i,j}| \|e_i e_j^T\|_* = \sum_{i,j} |X_{i,j}| = \|X\|_{1,1}.$$

□

In fact, these are the best constants possible. To see this, first consider the matrix  $X$  with a 1 in the upper-left entry and 0 elsewhere. Clearly,  $\|X\|_* = \|X\|_{1,1} = 1$ , so the right-hand inequality is tight. For the left-hand inequality, consider the all-ones matrix  $X$ . This has one singular value,  $\sqrt{nm}$ , so  $\|X\|_* = \sqrt{nm}$ . On the other hand,  $\|X\|_{1,1} = nm$ . Therefore,  $\|X\|_{1,1} = \sqrt{nm}\|X\|_*$  in this case.

## D Hyperparameter optimization

We firstly provide results of step size tuning, as shows in Table 5 we reported stepsize tuning results for all of our experiments. We tuned these step sizes by evaluating many logarithmically spaced step sizes (e.g.,  $2^{-10}, \dots, 2^0$ ) and evaluated on validation loss.

This step sizes tuning, for 8 gradient coding methods and 3 datasets was only possible because fairly small networks were used.

Table 5: Tuned stepsizes for experiments

| Experiments | CIFAR-10 & ResNet-18 | SVHN & ResNet-18 | CIFAR-10 & VGG-11-BN |
|-------------|----------------------|------------------|----------------------|
| SVD rank 1  | 0.0625               | 0.1              | 0.125                |
| SVD rank 2  | 0.0625               | 0.125            | 0.125                |
| SVD rank 3  | 0.125                | 0.125            | 0.0625               |
| SVD rank 4  | 0.0625               | 0.125            | 0.15                 |
| QSGD 1bit   | 0.0078125            | 0.0078125        | 0.0009765625         |
| QSGD 2bit   | 0.0078125            | 0.0078125        | 0.0009765625         |
| QSGD 4bit   | 0.125                | 0.046875         | 0.015625             |
| QSGD 8bit   | 0.125                | 0.125            | 0.0625               |

## E Additional Experiments

**Runtime analysis:** We empirically study runtime costs of spectral-ATOMO with sparsity budget set at 1, 2, 3, 6 and made comparisons among  $b$ -bit QSGD and TernGrad. We deployed distributed training on ResNet-18 with batch size  $B = 256$  on the CIFAR-10 dataset run with m5.2xlarge instances. As shown in Figure 4, there is a trade-off between the amount of communication per iteration and the running time for both singular value sparsification and QSGD. In some scenarios, spectral-ATOMO attains a higher compression ratio than QSGD and TernGrad. For example, singular value sparsification with sparsity budget 1 may communicate smaller messages than  $\{2, 4\}$ -bit QSGD and Terngrad.

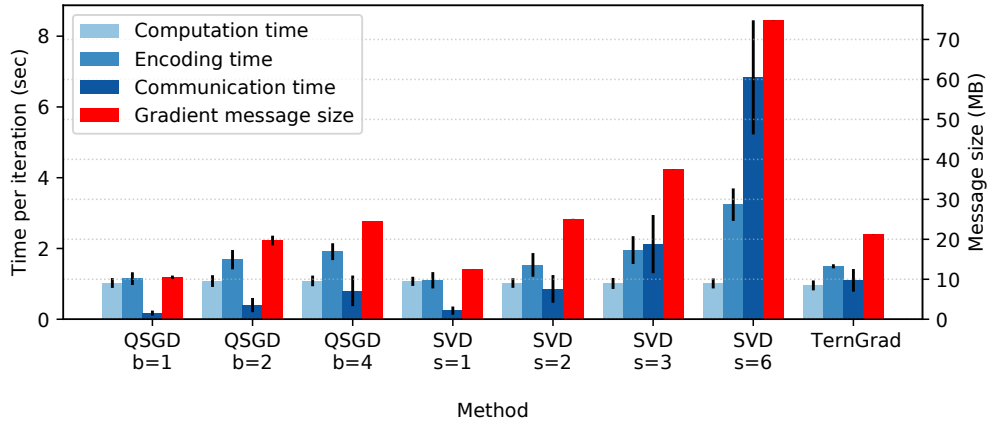

Figure 4: Runtime analysis of different sparsification methods (singular value sparsification, QSGD, and TernGrad) for ResNet-18 trained on CIFAR-10. The values shown are computation, encoding and communication time as well as the size of the message required to send gradients between workers.

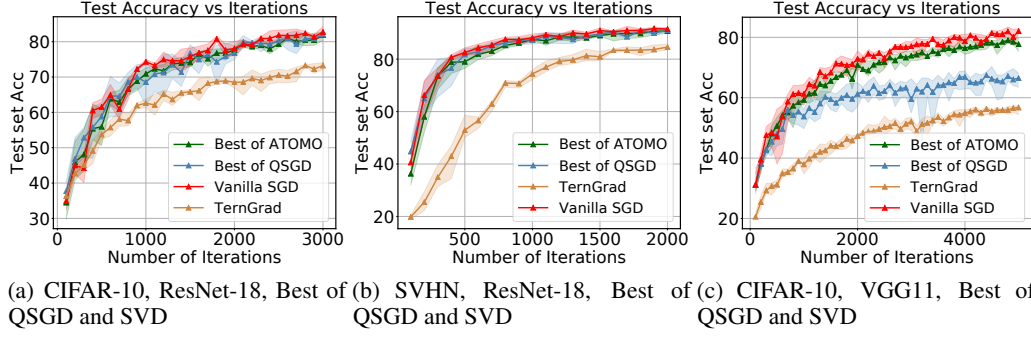

Figure 5: Convergence rates with respect to number of iterations on: (a) CIFAR-10 on ResNet-18 of best performances from QSGD and SVD (b) SVHN on ResNet-18 of best performances from QSGD and SVD, (c) CIFAR-10 on VGG-11-BN best of performances from QSGD and SVD

|               |     |            |            |            |            |             |             |
|---------------|-----|------------|------------|------------|------------|-------------|-------------|
| Test accuracy | 65% | 3.66x      | 3.02x      | 2.78x      | 2.71x      | 1.25x       | 1.23x       |
|               | 68% | 2.71x      | 2.48x      | 2.53x      | 2.38x      | 1.13x       | 0.99x       |
|               | 71% | 3.16x      | 2.96x      | 2.55x      | 2.5x       | 1.57x       | 1.29x       |
|               | 74% | 2.89x      | 2.82x      | 3.96x      | 1.96x      | 1.68x       | 1.43x       |
|               |     | SVD<br>s=1 | SVD<br>s=2 | SVD<br>s=3 | SVD<br>s=4 | QSGD<br>b=4 | QSGD<br>b=8 |
|               |     | Method     |            |            |            |             |             |

Table 6: Speedups of spectral-ATOMO with sparsity budget  $s$ ,  $b$ -bit QSGD, and TernGrad using VGG11 on CIFAR-10 over vanilla SGD.
